# Supplementary material for: The Malay version of the caregiver assessment of function and upset instrument (Malay-CAFU): a translation and validation study among informal stroke caregivers
Source: Springer Nature journal article supplement (doi:10.1186/s12889-023-15076-1), 2023-01-30
Supplement: MOESM1 [file 12889_2023_15076_MOESM1_ESM.pdf]

### **Supplementary material 1**

Demographic characteristics of the panel of experts of the content validation study (n=10)

| <b>Characteristics</b>        | <b>Frequency (%)</b> | <b>Mean (SD)</b> |
|-------------------------------|----------------------|------------------|
| <b>Age</b>                    |                      | 26 (2.05)        |
| <b>Category</b>               |                      |                  |
| Healthcare Professional       | 5 (50)               |                  |
| Caregiver                     | 5 (50)               |                  |
| <b>Gender</b>                 |                      |                  |
| Female                        | 9 (90)               |                  |
| Male                          | 1 (10)               |                  |
| <b>Education level</b>        |                      |                  |
| School (Secondary)            | 1 (10)               |                  |
| Tertiary (College/University) | 9 (90)               |                  |

**SD**, standard deviation
